# Supplementary material
Source: publisher figshare collection journal article supplement (https://acs.figshare.com/ndownloader/files/4493569)
Supplement: Supplementary file 1 [file 4493569]

## **Supplementary Materials**

### **Metal Cation Mediated Capillary Electrophoresis of Nucleic Acids**

Tao Li, Dapeng Zhang, Wenru Luo, Meiling Lu, Zhixin Wang, Yuling Song, Hailin  
Wang\*

State Key Laboratory of Environmental Chemistry and Ecotoxicology, Research  
Center for Eco-Environmental Sciences, Chinese Academy of Sciences, Beijing,  
100085, China

\*Correspondence should be addressed to Dr. Hailin Wang

Tel/Fax: 0086-10-62849600

E-mail: [hlwang@rcees.ac.cn](mailto:hlwang@rcees.ac.cn)

## Supporting Materials

Table S1. Summary of DNA/RNA molecules used in this study.

|                                     | Name            | Sequence                                                                   |
|-------------------------------------|-----------------|----------------------------------------------------------------------------|
| Single-stranded<br>oligonucleotides | dT <sub>n</sub> | 5'-TMR-poly (T) <sub>n</sub>                                               |
|                                     | HBB-1           | 5'Cy3-ATGGTGCACCTGACTCCTGAGGAGAAGTCTGC<br>CGTTACT                          |
|                                     | HBB-2           | 5'Cy3-ATGGTGCACCTGACTCCTGTGGAGAAGTCTGC<br>CGTTACT                          |
|                                     | p53-1           | 5'-TMR-GAAGCTCCCAGAATGCCAGAGGCTGCTCCC<br>CCCGTGGCCCCTGCACCAGCGACTCCTACACCG |
|                                     | p53-2           | 5'-TMR-GAAGCTCCCAGAATGCCAGAGGCTGCTCCC<br>CCCGTGGCCCCTGCACCAGCGACTCCTACACCG |
|                                     | TMR-37mer       | 5'TMR-TTACACGCTTCCTCAACCACTTACCATACTCG<br>AGATT                            |
|                                     | C-37mer         | 5'-AATCTCGAGTATGGTAAGTGGTTGAGGAAGCGTGT<br>AA                               |
| MicroRNAs                           | has-miR-125b    | 5'Cy3-UCCCUGAGACCCUAACUUGUGA                                               |
|                                     | has-miR-150     | 5'Cy3-UCUCCCAACCCUUGUACCAGUG                                               |
|                                     | has-miR-223     | 5'Cy3-UGUCAGUUUGUCAAUACCCCA                                                |
|                                     | has-miR-382     | 5'Cy3-GAAGUUGUUCGUGGUGGAUUCG                                               |

## Figure S1

The separation of 14 poly (dT) oligomers by 20% PAGE with a dimension of 10.5cm  $\times$  8cm  $\times$  1mm. The electrophoresis was performed under 120 V for 60 min. The oligomers were labeled by tetramethylrhodamine at 5'end for fluorescence imaging. The pictures were taken by UV light irradiation.

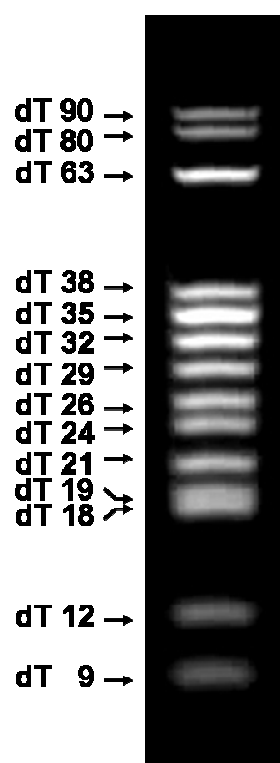

**Figure S2** Measured apparent mobility of 14 poly (dT) in the presence of 2 mM MgCl<sub>2</sub>.

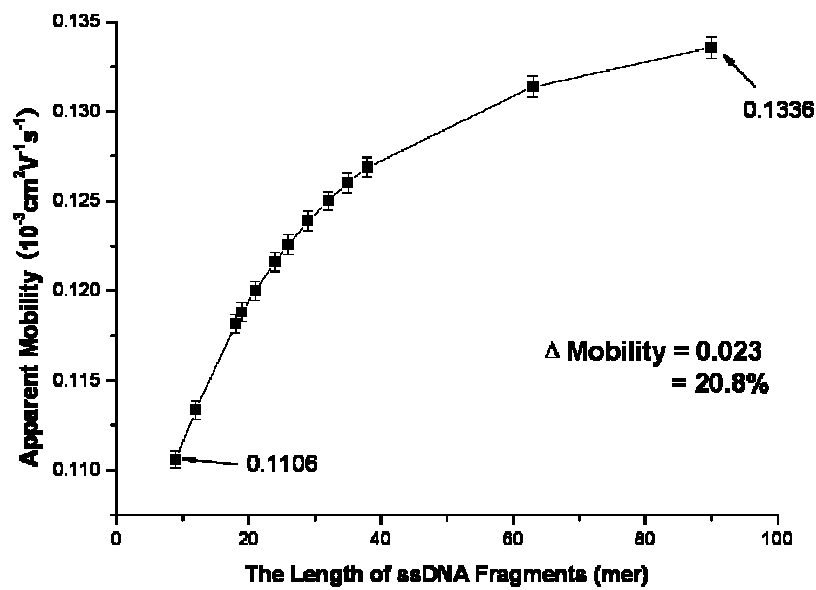

Apparent Electrophoretic Mobility =

$$\frac{v}{E} = \frac{L_{\text{effective}} \times L_{\text{total}}}{U \times t} = \frac{33.5 \times 40}{20 \times 60 \times t} (10^{-3} \cdot \text{cm}^2 (\text{V}^{-1} \text{s}^{-1}))$$

$v$  : Velocity of the oligomer (cm/s)

$E$  : The strength of electric field (V/cm)

$L_{\text{effective}}$  : The effective length of capillary (from inlet to detection window) (cm)

$L_{\text{total}}$  : Total length of capillary (from inlet to outlet) (cm)

$U$  : Separation voltage (kV)

$t$  : Migration time (min)

**Figure S3** The separation of TMR labeled p53-1 and p53-2 by 15% native PAGE (A), 15% denaturing PAGE (B), and 15% DNA sequencing PAGE (C). In each electropherogram, lanes 1 and 2 are p53-1 and p53-2, respectively. Lane 3 is the mixture of the two oligomers. The gel dimension for native and denaturing PAGE was  $10.5\text{cm} \times 8\text{cm} \times 1\text{mm}$ . The electrophoresis was performed under 120 V for 60 min. The pictures were taken by UV light excitation. The gel dimension for sequencing PAGE was  $48\text{cm} \times 17\text{cm} \times 0.3\text{mm}$ . The electrophoresis was performed under a constant power of 60W for 2.5h. The fluorescence pictures for native and denaturing PAGE were taken by UV irradiation, and that for sequencing gel was taken by excitation at 543.5nm (provided by a green laser).

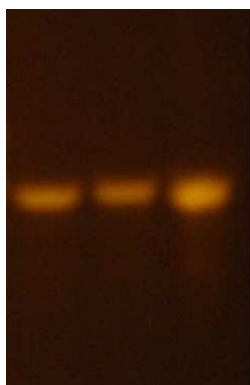

Figure S3A

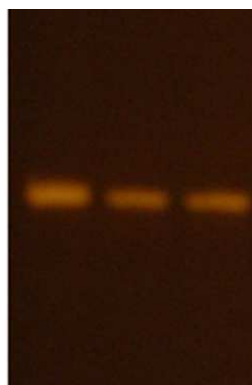

Figure S3B

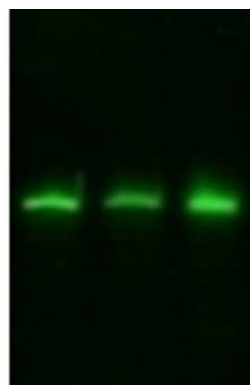

Figure S3C

Figure S4 Separation of Cy3 labeled HBB-1 and HBB-2 by 15% native PAGE (A), 15% denaturing PAGE (B), and 15% DNA sequencing PAGE (C). In each electropherogram, lanes 1 and 2 are HBB-1 and HBB-2 respectively. Lane 3 is the mixture of these two oligomers. The other conditions are the same as described in Figure S3

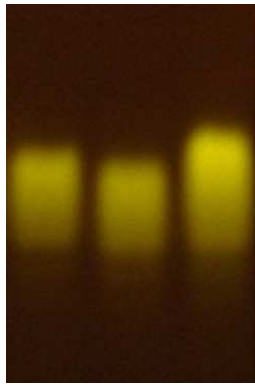

Figure S4A

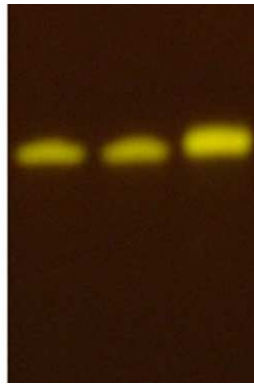

Figure S4B

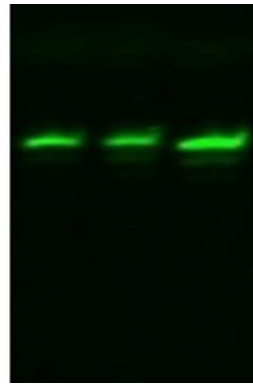

Figure S4C
